# Supplementary material for: Ventrolateral periaqueductal gray neurons prioritize threat probability over fear output
Source: eLife journal article supplement (doi:10.7554/elife.45013), 2019-03-07
Supplement: supp [file elife-45013-supp-v1.zip]

Archive with 11 entries (11 files):
- elife_poa_e45013_Figure_1_figure_supplement_3.pdf
- elife_poa_e45013_Figure_1_figure_supplement_2.pdf
- elife_poa_e45013_Figure_5_figure_supplement_1.pdf
- elife_poa_e45013_Figure_2_figure_supplement_1.pdf
- elife_poa_e45013_Figure_1_figure_supplement_4.pdf
- elife_poa_e45013_Figure_1_figure_supplement_5.pdf
- elife_poa_e45013_Figure_1_figure_supplement_1.pdf
- elife_poa_e45013_Transparent_Reporting_File.pdf
- elife_poa_e45013_Figure_5_figure_supplement_2.pdf
- elife_poa_e45013_Figure_1_figure_supplement_6.pdf
- elife_poa_e45013_Figure_2_figure_supplement_2.pdf
