# Supplementary material for: Ventrolateral periaqueductal gray neurons prioritize threat probability over fear output
Source: eLife journal article supplement (doi:10.7554/elife.45013), 2019-03-07
Supplement: supp [file elife-45013-supp-v1.zip]

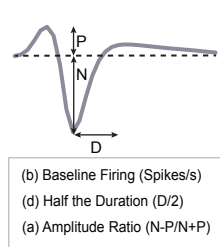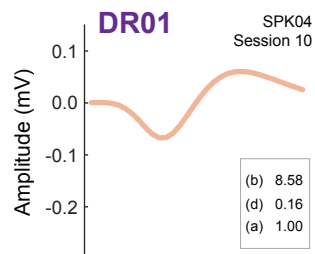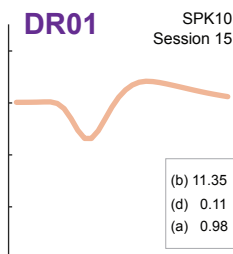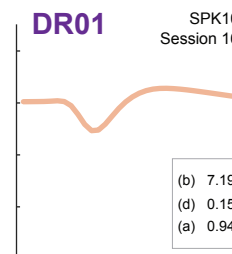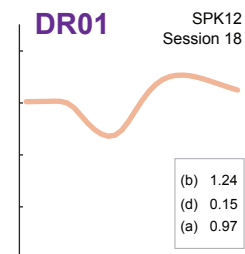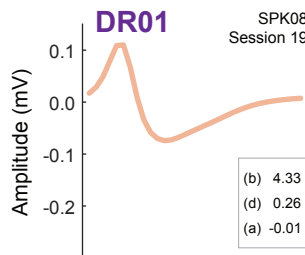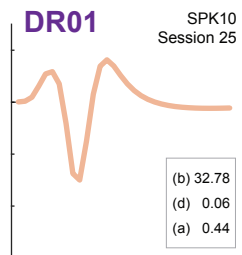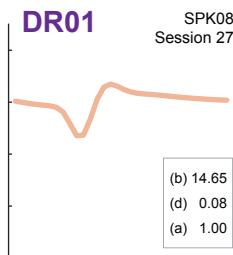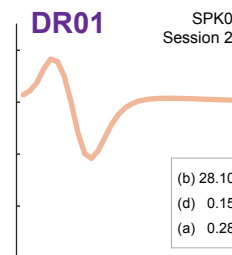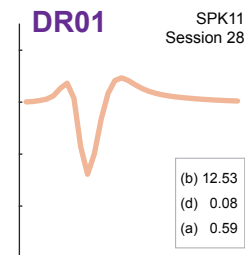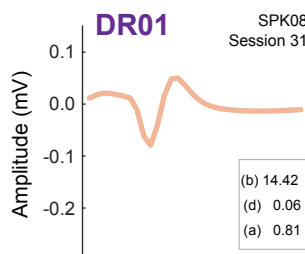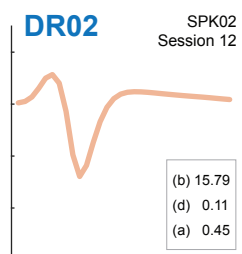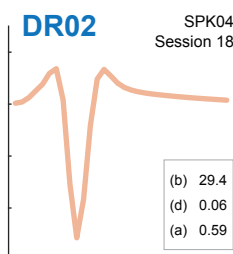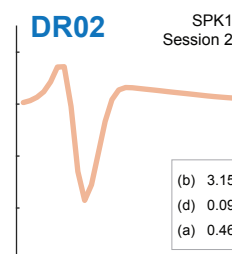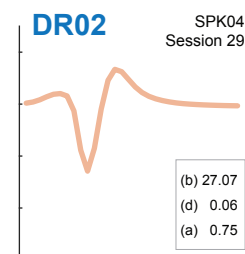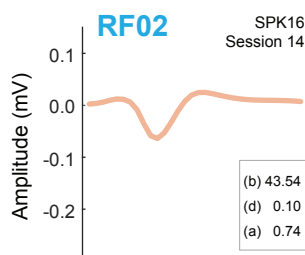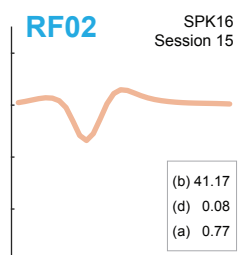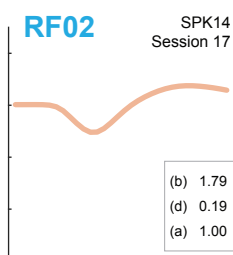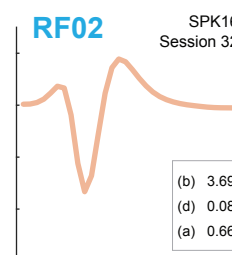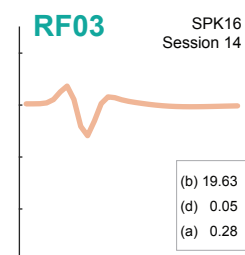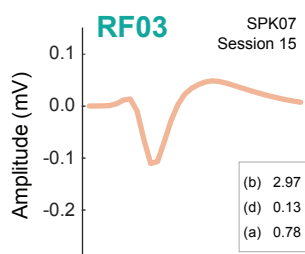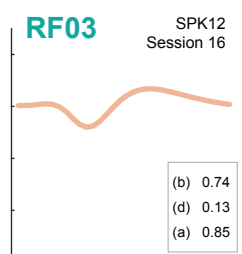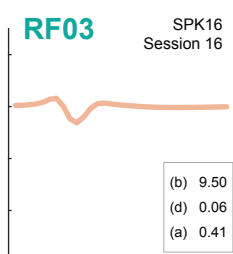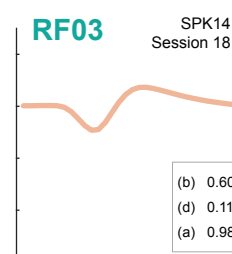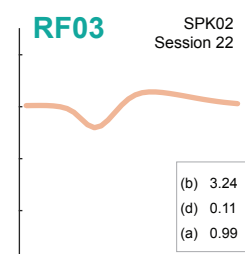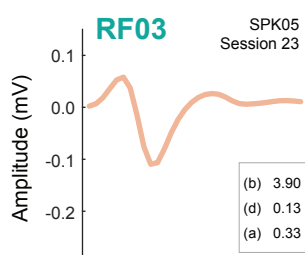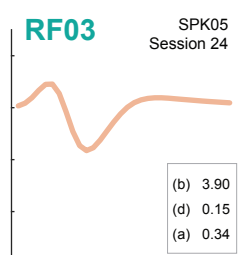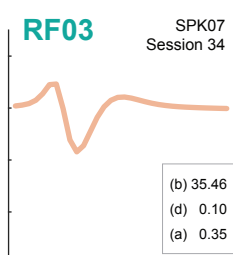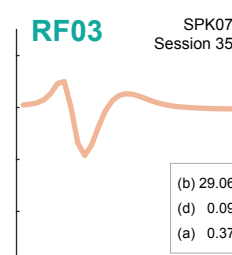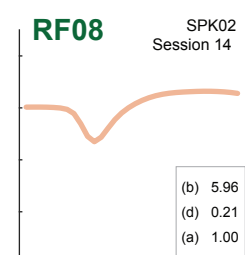

Time

Time

Time

Time

Time

**Figure 1-figure supplement 4. Waveform and firing characteristics of Onset neurons.** Mean waveform (mV x time) is shown for each Onset neuron ( $n = 29$ , waveform color is peach as in Figure 1E). For each neuron, the baseline firing rate (b), half the duration (d) and amplitude ratio (a) are provided. The waveform properties used to determine half the duration (D) and the properties contributing to the amplitude ratio (N and P) are demonstrated in the top left. The individual the neuron was obtained from is shown in the upper left, animal identity is color coded. The spike number, indicating the channel on which the neuron was recorded, and the behavior session # are shown in the top right. We performed a correlation analysis to determine if the waveform shape of each neuron was more correlated with waveform from the same individual, vs. the other individuals.  $R^2$  values were determined for each waveform pair ( $n = 28$ ), then a two-tailed t-test ( $p < 0.05$ , uncorrected) was performed comparing the  $R^2$  values from the same individual or all others. Only 3 neurons from one individual, RF03 (SPK05/Session 23, SPK07/Session 34 and SPK07/Session 35), were found to have waveforms that were more similar to neurons from that individual than others. However, any correction on this p value (28 tests were performed for each waveform) resulted in no neuron achieving significance. Further, only two of these neurons (SPK07/Session 34 and SPK07/Session 35) showed cue activity patterns that resembled one another. Removal of one or both of these waveforms made no impact on any statistical result.
