# Supplementary material for: Ventrolateral periaqueductal gray neurons prioritize threat probability over fear output
Source: eLife journal article supplement (doi:10.7554/elife.45013), 2019-03-07
Supplement: supp [file elife-45013-supp-v1.zip › elife_poa_e45013_Figure_1_figure_supplement_3.pdf]

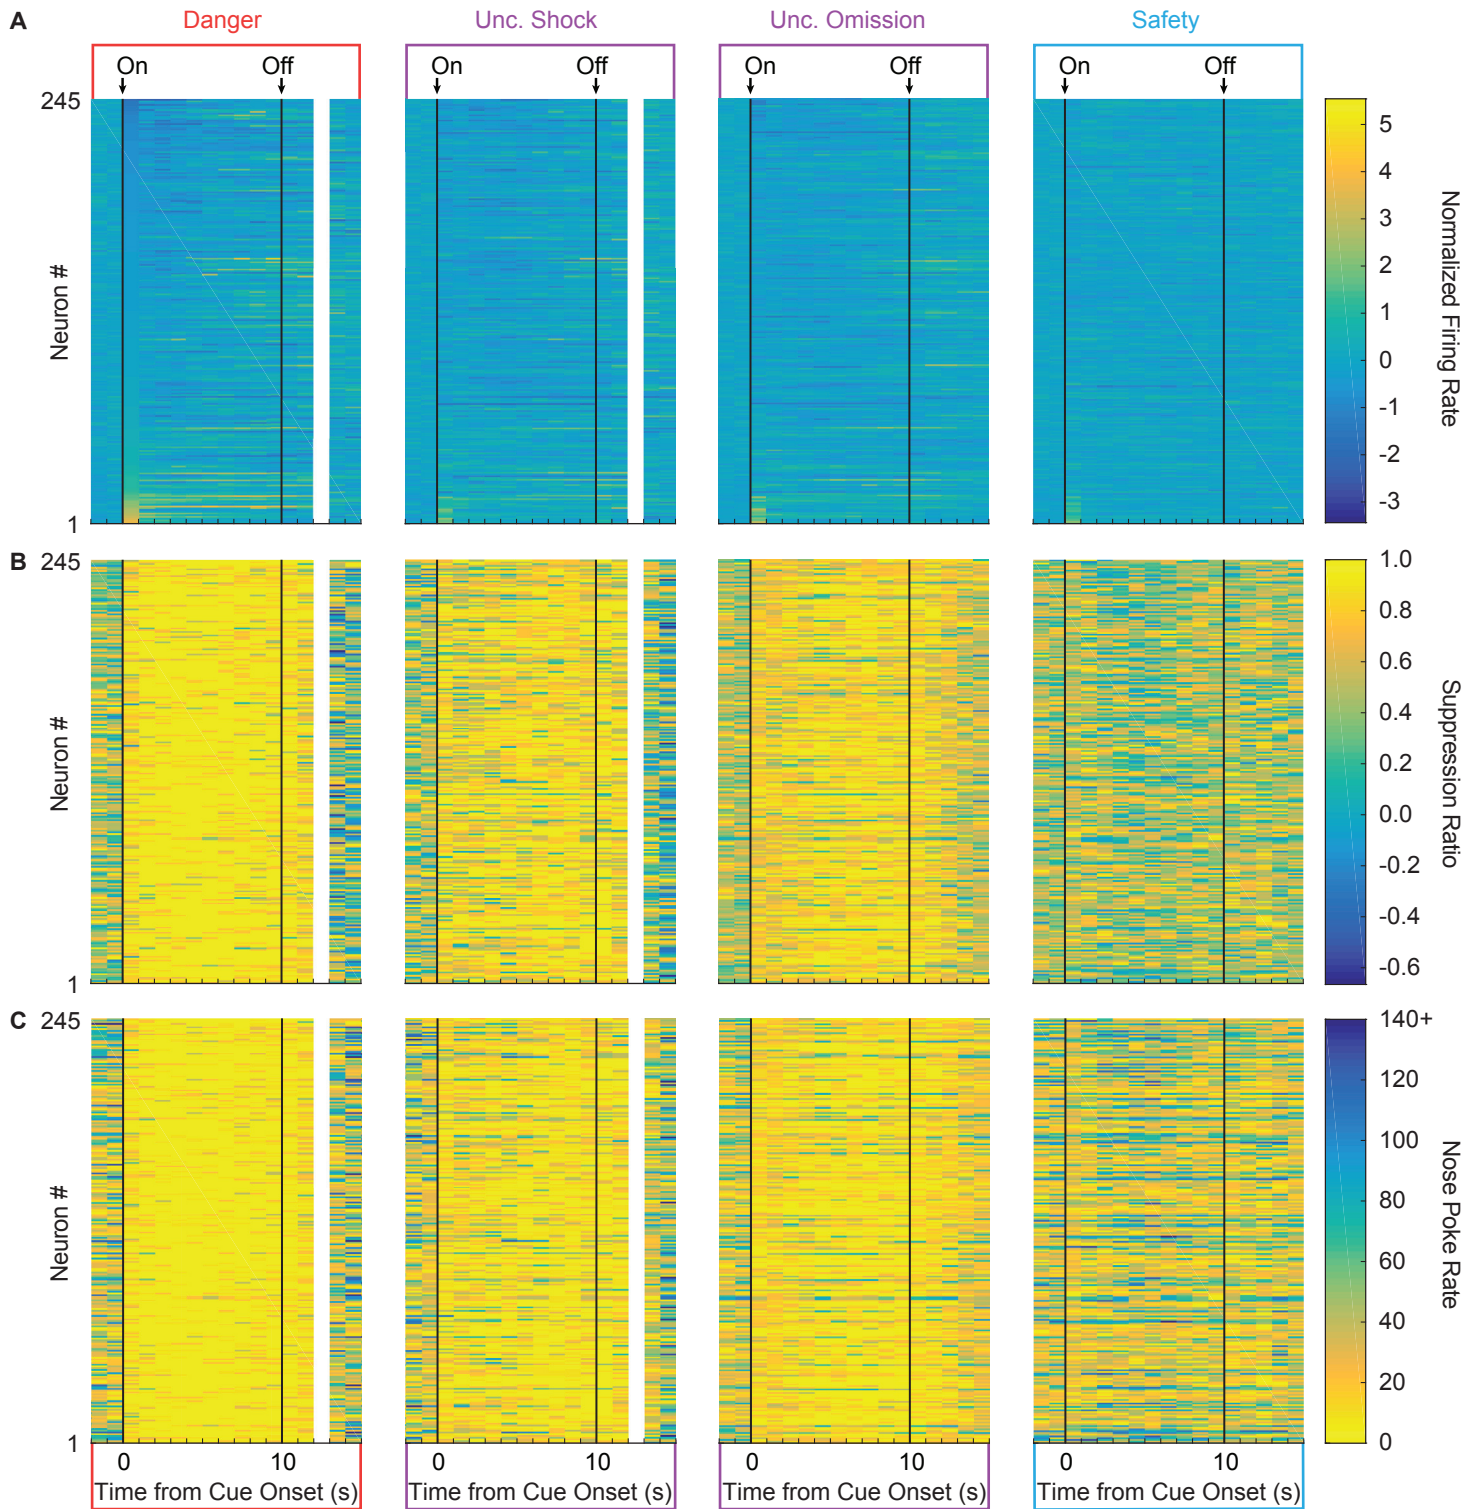

**Figure 1-figure supplement 3. Firing and behavior for every recorded neuron. (A)** A heat plot for normalized firing rate in 1 s intervals is shown for each neuron (x axis,  $n = 245$ ) prior to and following cue onset for each trial type (danger, uncertainty shock, uncertainty omission and safety). Color scale for normalized firing rate is shown to the right; yellow indicates high firing and blue low firing. Firing rate during foot shock period could have been contaminated by noise artifact and is not shown. **(B)** An identical heat plot is made for suppression ratio; yellow indicates high suppression ratio and high fear, whereas dark blue indicates low suppression ratio and low fear. **(C)** Heat plot for nose poke rate; yellow indicates low nose poke rates and dark blue indicates high nose poke rates. Order of neurons 1-245 maintained for A, B and C. Note the virtually identical patterns of behavior obtained with suppression ratio and nose poke rate.
