# Supplementary material for: Ventrolateral periaqueductal gray neurons prioritize threat probability over fear output
Source: eLife journal article supplement (doi:10.7554/elife.45013), 2019-03-07
Supplement: supp [file elife-45013-supp-v1.zip › elife_poa_e45013_Figure_1_figure_supplement_6.pdf]

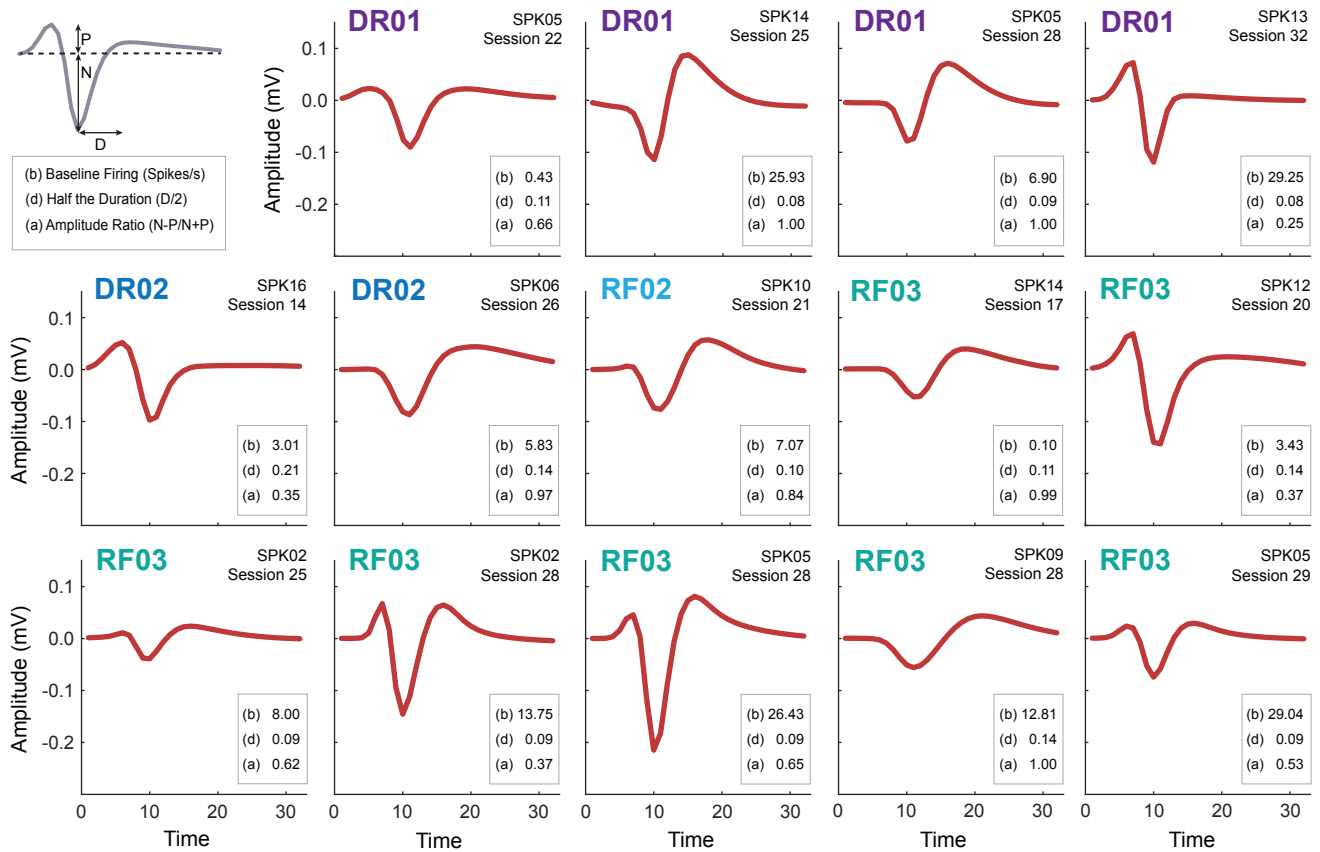

**Figure 1-figure supplement 6. Waveform and firing characteristics of Ramping neurons.** Mean waveform (mV x time) is shown for each Ramping neuron ( $n = 14$ , waveform color maroon as in Figure 1E). For each neuron, the baseline firing rate (b), half the duration (d) and amplitude ratio (a) are provided. The waveform properties used to determine half the duration (D) and the properties contributing to the amplitude ratio (N and P) are demonstrated in the top left inset. The individual the neuron was obtained from is shown in the upper left, with identity color coded. The spike number, indicating the channel on which the neuron was recorded, and the behavior session # are shown in the top right. We performed a correlation analysis to determine if the waveform shape of each Ramping neuron was more correlated with waveform shapes from the same individual, versus the other individuals.  $R^2$  values were determined for each neuron pair ( $n = 13$ ), then a two-tailed t-test ( $p < 0.05$ , uncorrected) was performed comparing the  $R^2$  values from the same individual or all others. No waveform shape was more similar to those obtained from the same individual compared to those obtained from others.
