# Supplementary material for: Ventrolateral periaqueductal gray neurons prioritize threat probability over fear output
Source: eLife journal article supplement (doi:10.7554/elife.45013), 2019-03-07
Supplement: supp [file elife-45013-supp-v1.zip › elife_poa_e45013_Figure_2_figure_supplement_1.pdf]

### A Onset Population (n = 29)

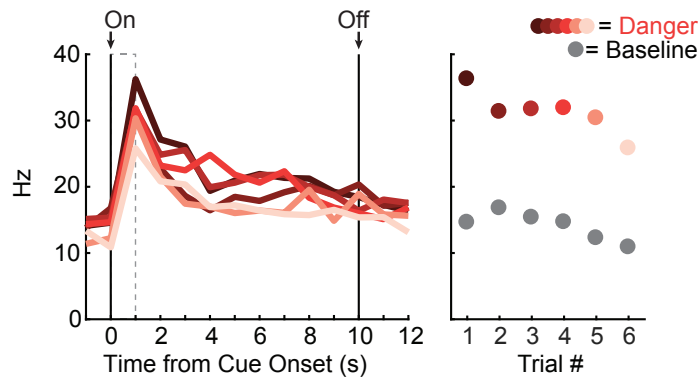

### E Ramping Population (n = 14)

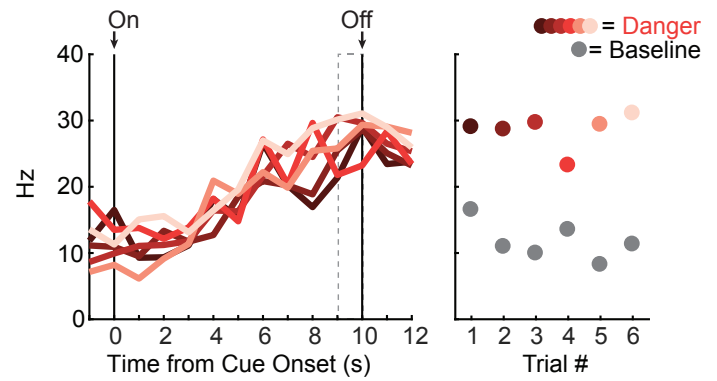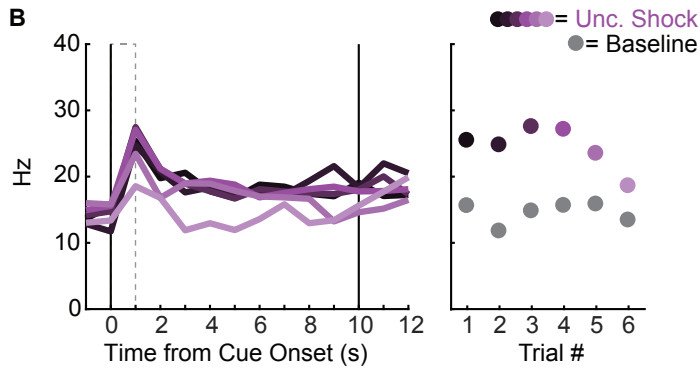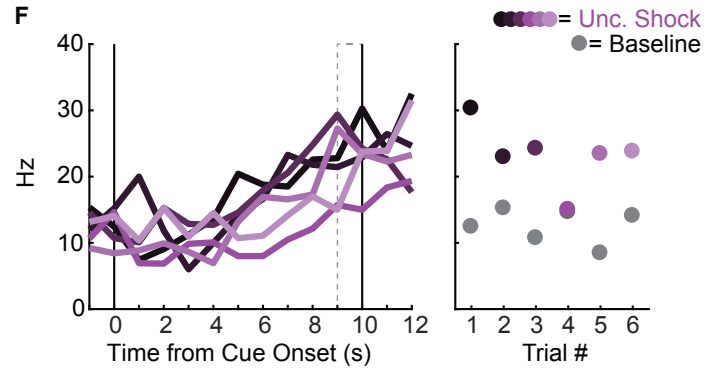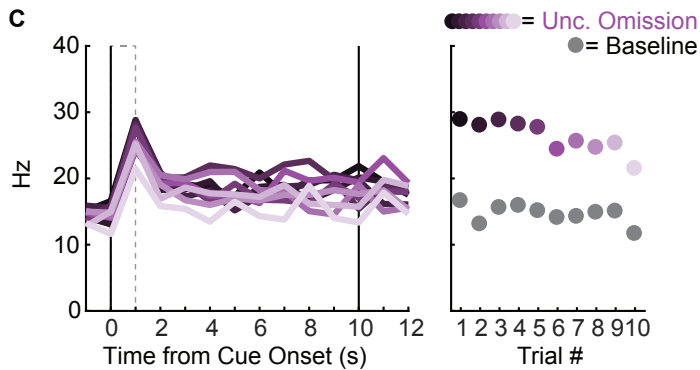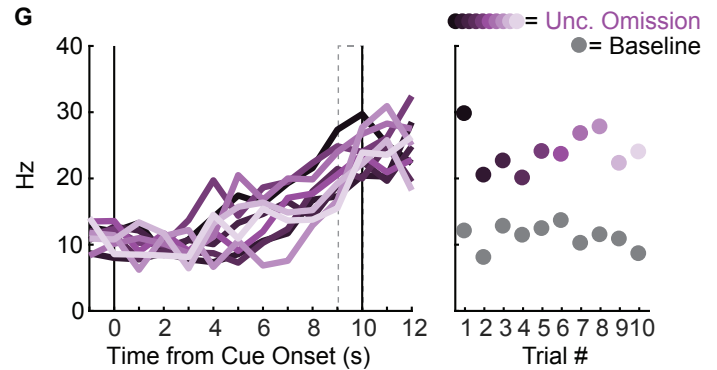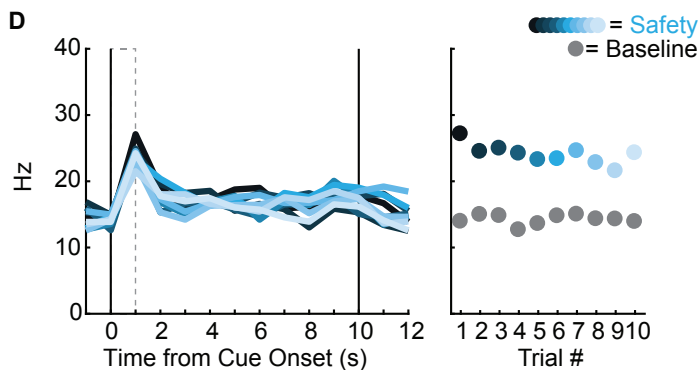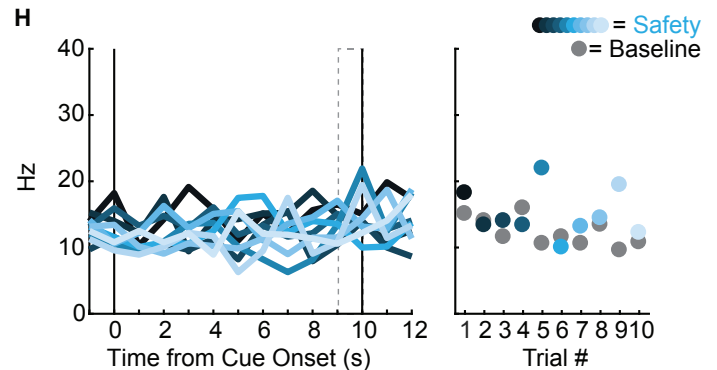

**Figure 2-figure supplement 1. Trial by trial firing for Onset and Ramping populations.** (A, left) Raw firing rate (Hz) for the Onset population (n = 29) is shown across cue presentation for each of the six danger trials. Trials are color-coded from dark (first trial) to light (last trial) with 'On' indicating cue onset and 'Off' indicating cue offset. (A, right) Population mean firing rate is shown for the first 1 s cue interval (dashed box in A), for each trial. Color scheme maintained from (A, left). Population mean baseline firing (2 s prior to cue presentation) is shown for each individual trial (gray circles). Identical plots using unique color schemes (uncertainty, purple and safety, blue) were made for each trial type: (B) uncertainty shock, (C) uncertainty omission and (D) safety. Note that increased cue firing over baseline tended to be highest on trial 1, but was observed for every individual trial for all cues. A nearly identical set of plots were made for the Ramping population (n = 14, E - H), only now population mean firing rate for each trial (right) is shown for the last 1 s interval of the cue (dashed box on left). Increased cue firing over baseline was consistently observed on danger and uncertainty trials, but not safety trials. Firing patterns observed for the mean of all trials (Figure 2A, C) were observed at the single trial level for Onset and Ramping populations.
