# Supplementary material for: Ventrolateral periaqueductal gray neurons prioritize threat probability over fear output
Source: eLife journal article supplement (doi:10.7554/elife.45013), 2019-03-07
Supplement: supp [file elife-45013-supp-v1.zip › elife_poa_e45013_Figure_5_figure_supplement_2.pdf]

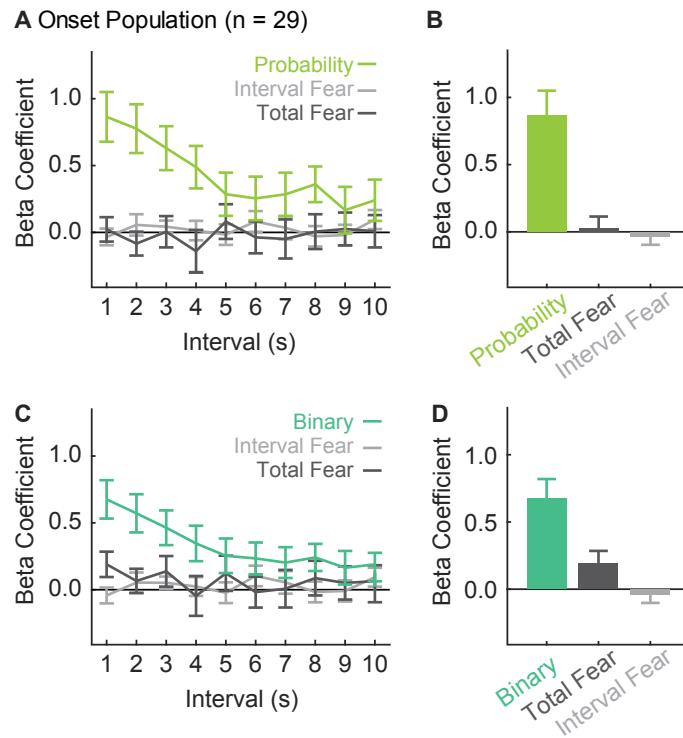

**Figure 5-figure supplement 2. Onset single-unit activity is better captured by threat probability than a binary output.** We compared (A & B) regression as performed in manuscript to (C & D) regression performed with a binary regressor (danger = 1, uncertainty & safety = 0). Beta coefficients are plotted as mean  $\pm$  SEM (probability, green; binary, teal; total fear, dark gray; interval fear, light gray). Separate regression is performed to avoid multicollinearity; the probability and binary regressors are highly correlated ( $R^2 = 0.77$ ). ANOVA for beta coefficients using analysis (probability vs. binary), regressor and interval as factors found an analysis  $\times$  regressor  $\times$  interval interaction ( $F_{18,504} = 2.51$ ,  $p = 5.89 \times 10^{-4}$ ). ANOVA for only the first 1 s interval found an analysis  $\times$  regressor interaction ( $F_{2,56} = 7.80$ ,  $p = 1.03 \times 10^{-3}$ ). The activity of vIPAG single-units was better captured by the regressor that reflected the actual foot shock probability (uncertainty = 0.375) over a regressor that equated uncertainty to safety (uncertainty = 0.00).
